# Supplementary material
Source: PubMed Central journal article supplement (PMC10374894)

Full unedited gel for Figure 1c

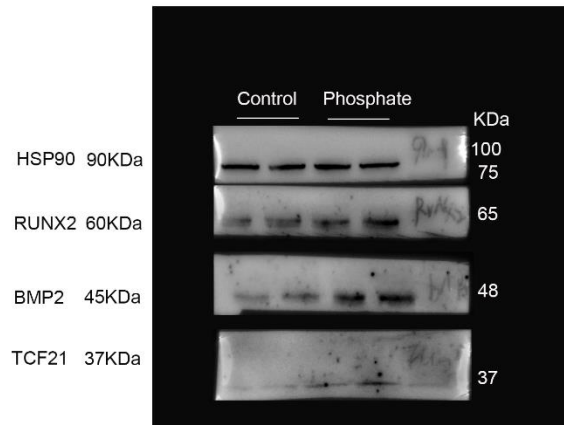

Full unedited gel for Figure 2c

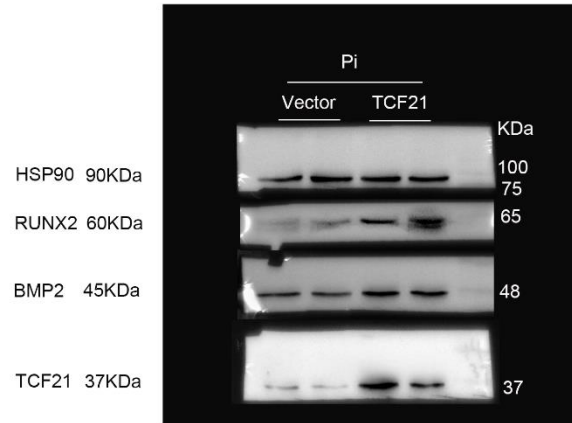

Full unedited gel for Figure 2e

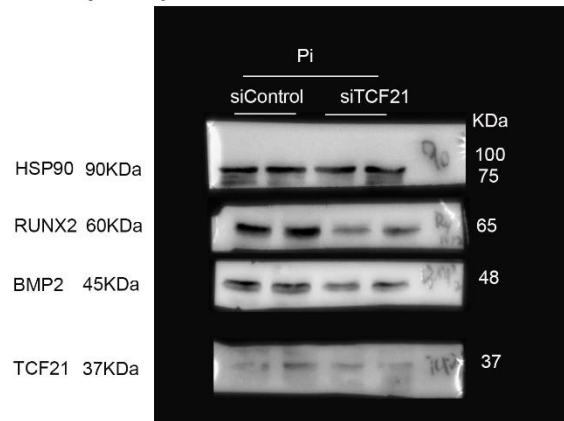

Full unedited gel for Figure 4a

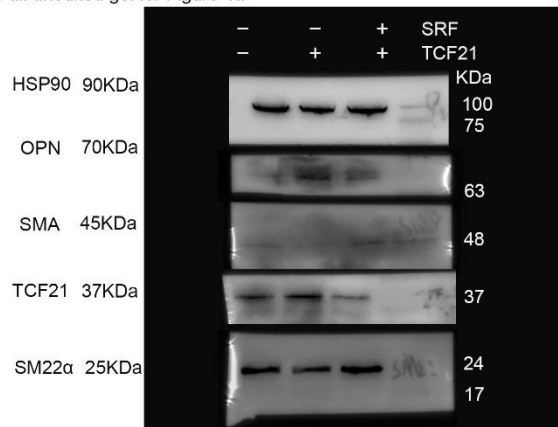

Full unedited gel for Figure 4c

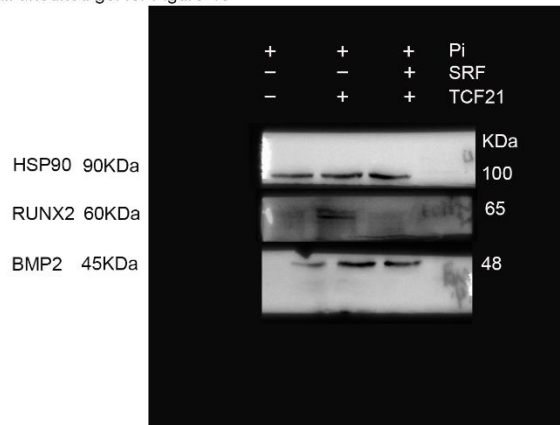

Full unedited gel for Figure 5a

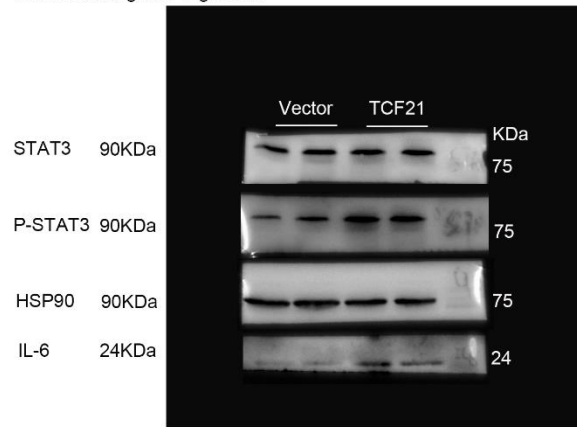

Full unedited gel for Figure 5c

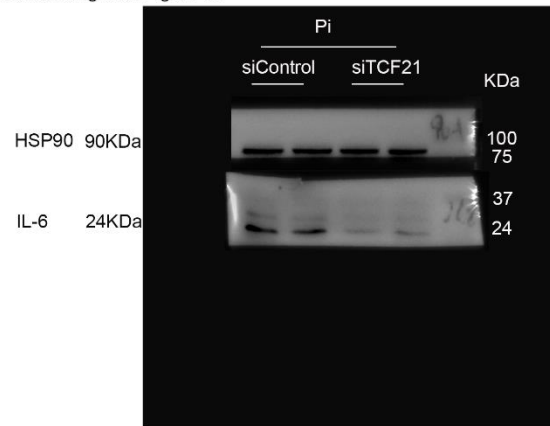

Full unedited gel for Figure 5j

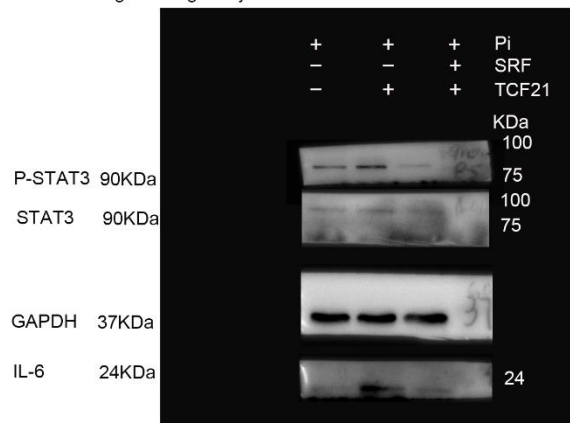

Full unedited gel for Figure 6a

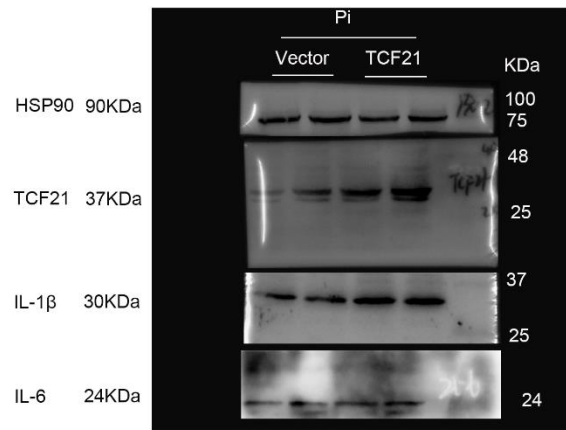

Full unedited gel for Figure 6d

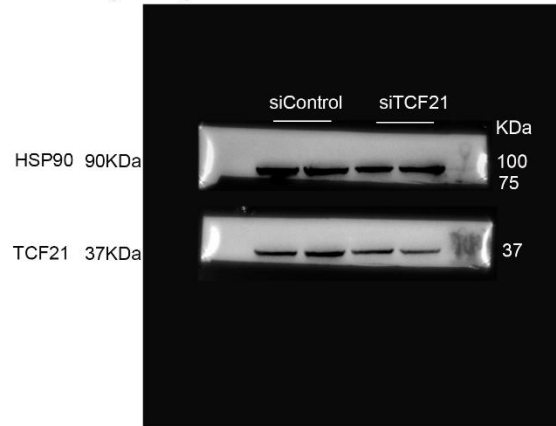

Full unedited gel for Figure 6f

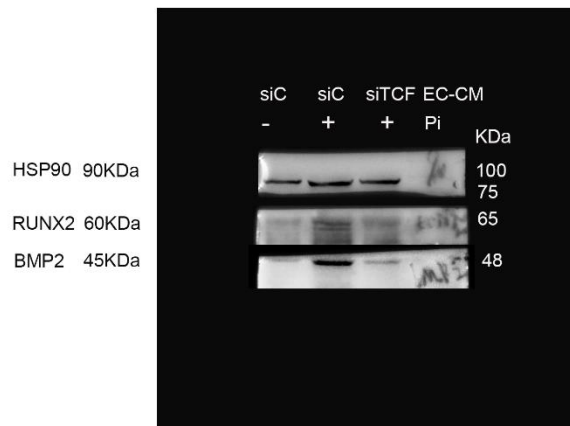

Full unedited gel for Figure S2a

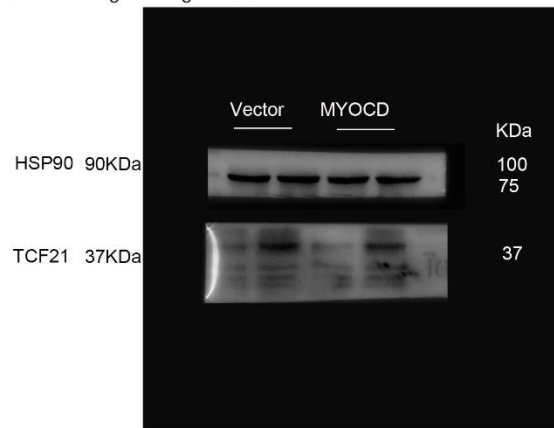

Full unedited gel for Figure S2b

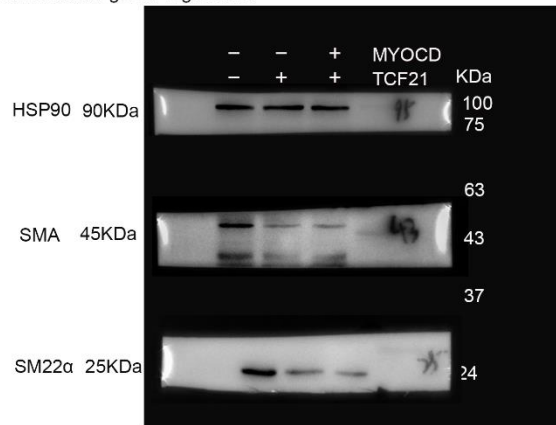

Full unedited gel for Figure S3a

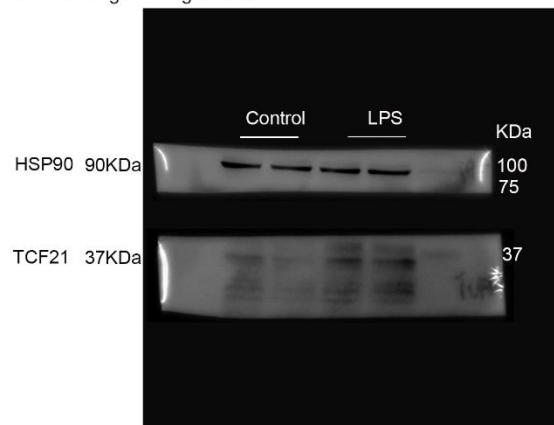

Full unedited gel for Figure S3b

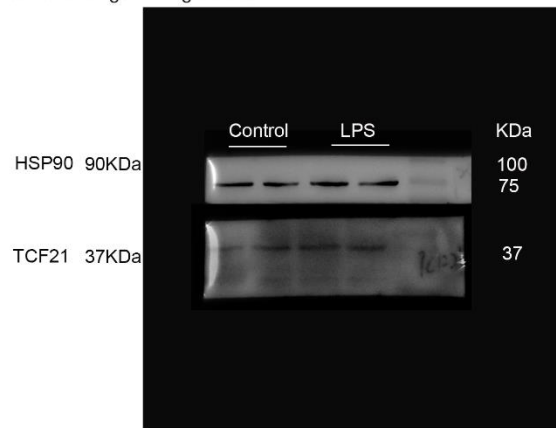

Full unedited gel for Figure S3c

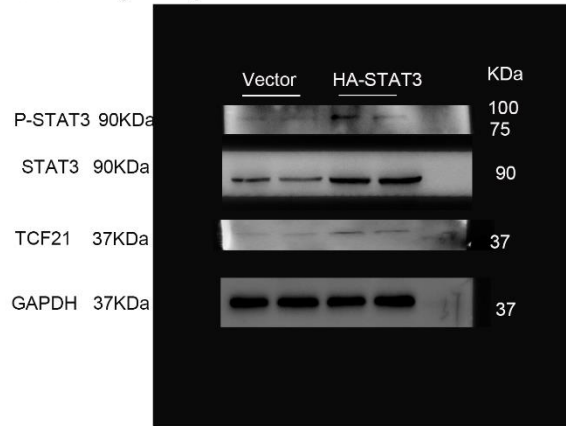

Full unedited gel for Figure S3d

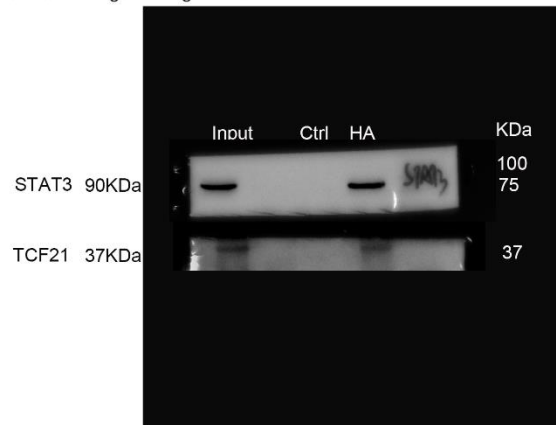

Supplement: 41401_2023_1077_MOESM1_ESM.pdf [file 41401_2023_1077_MOESM1_ESM.pdf]
